# Supplementary material for: Spatial-CITE-seq: spatially resolved high-plex protein and whole transcriptome co-mapping
Source: PubMed Central journal article supplement (PMC8978952; doi:10.21203/rs.3.rs-1499315/v1), 2022-03-30
Supplement: 855f4b0aeae0a12f1ec39c88.pdf [file 855f4b0aeae0a12f1ec39c88.pdf]

# Supplemental Information

## **Spatial-CITE-seq: spatially resolved high-plex protein and whole transcriptome co-mapping**

Yang Liu<sup>1,2</sup>, Marcello DiStasio<sup>3</sup>, Graham Su<sup>1,2</sup>, Hiromitsu Asashima<sup>4,8</sup>, Archibald Enninfu<sup>1,2</sup>, Xiaoyu Qin<sup>1,2</sup>, Yanxiang Deng<sup>1,2</sup>, Pino Bordignon<sup>5</sup>, Marco Cassano<sup>5</sup>, Mary Tomayko<sup>3,6</sup>, Mina Xu<sup>3</sup>, Stephanie Halene<sup>7</sup>, Joseph E. Craft<sup>7,8,9</sup>, David Hafler<sup>4,8,9</sup>, and Rong Fan<sup>1,2,3,9\*</sup>

<sup>1</sup> Department of Biomedical Engineering, Yale University, New Haven, CT 06520, USA

<sup>2</sup> Yale Stem Cell Center and Yale Cancer Center, Yale School of Medicine, New Haven, CT 06520, USA

<sup>3</sup> Department of Pathology, Yale School of Medicine, New Haven, CT 06520, USA

<sup>4</sup> Department of Neurology, Yale School of Medicine, New Haven, CT 06520, USA

<sup>5</sup> Lunaphore Technologies SA, Route de Lully 5c, 1131 Tolochenaz, Switzerland

<sup>6</sup> Department of Dermatology, Yale School of Medicine, New Haven, CT 06520, USA

<sup>7</sup> Department of Medicine, Yale School of Medicine, New Haven, CT 06520, USA

<sup>8</sup> Department of Immunobiology, Yale School of Medicine, New Haven, CT 06520, USA

<sup>9</sup> Human and Translational Immunology Program, Yale School of Medicine, New Haven, CT 06520, USA

\* to whom all correspondence should be addressed. (R.F., [rong.fan@yale.edu](mailto:rong.fan@yale.edu))

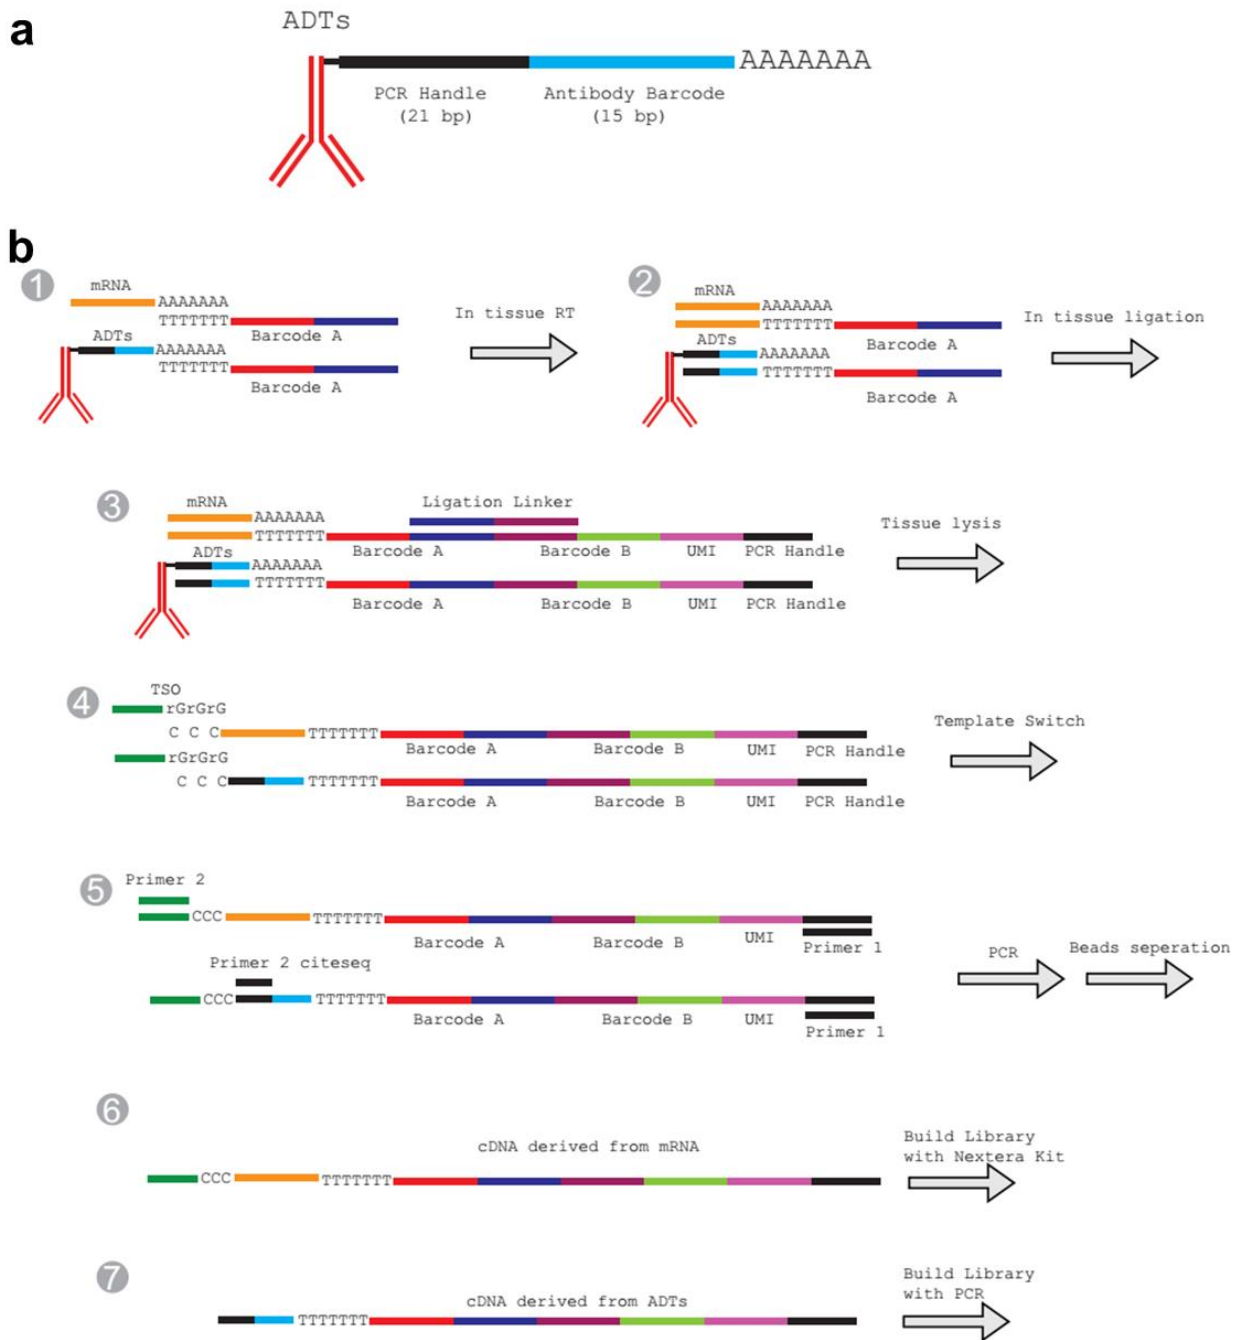

**Figure S1. Spatial-CITE-seq design and detailed workflow.** (a) ADT structure. The oligo labelled to the antibody has three functional regions: PCR handle (21 bp), antibody barcode (15 bp) and poly-A region (32 bp). (b) ADTs and mRNA with Poly-A region at the 3' end can be reverse transcribed into cDNA using Barcode A as the RT primer. Barcode A consists of three functional regions, the poly-T region, spatial barcode region and the ligation region. During the first flow, 50 Barcode As were loaded into 50 parallel channels and the RT reaction was carried out inside each isolated channel (Step 1&2). After peeling off the 1<sup>st</sup> PDMS, a 2<sup>nd</sup> PDMS was attached. The in-channel ligation was performed with injecting 50 Barcode Bs into each of the 50 channels which

are perpendicular to the channels of 1<sup>st</sup> PDMS chip (Step 3). Barcode B has four functional regions: ligation region, barcode region, UMI region and PCR handle region. Barcode B was also 5' biotin modification. After ligation, tissue was lysed, and cDNAs were purified with streptavidin beads. The cDNAs on the beads were templated switched with template switch oligo (Step 4). PCR was used to amplify the cDNA (Step 5). The products were split into two portions, the mRNA derived cDNAs and the ADT derived cDNAs. The library was then built separately. More details were in the method section.

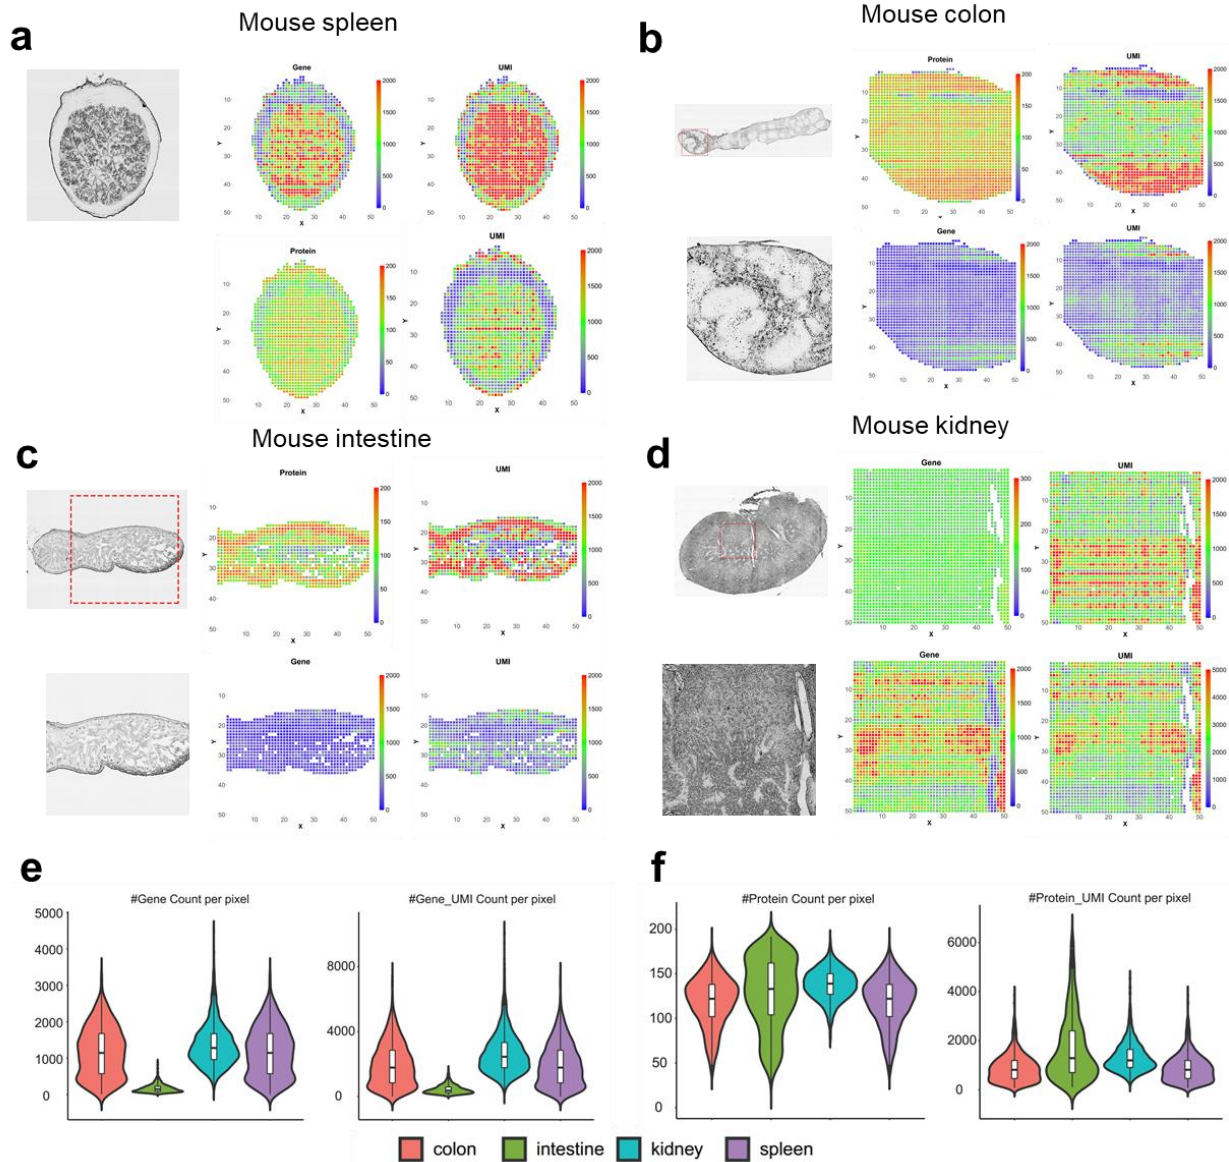

**Figure S2. Spatial mapping of mouse spleen, colon, intestine and kidney with Spatial-CITE-seq.** A 189 antibodies cocktail was used for all four mouse samples. The bright field image, spatial gene heatmap, spatial gene UMI heatmap, spatial protein heatmap and spatial protein UMI heatmap of spleen (a), colon (b), intestine (c) and kidney (d). (e) gene and gene UMI count per pixel of all four mouse samples. (f) Protein and protein UMI count per pixel of all four mouse samples.

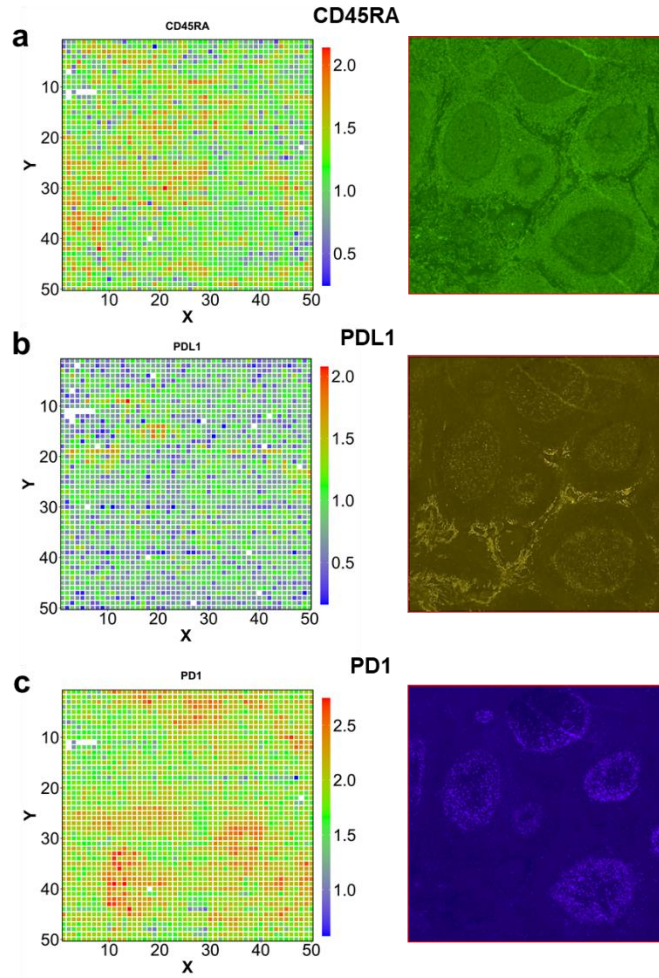

**Figure S3. Immunostaining validation of spatial protein profiles.** Sequential IF staining data using the FFeX technology by Lunaphore Technologies were compared side by side with Spatial-CITE-seq data. (a) CD45RA, (b) PDL1, (c) PD1. Note: the staining is not on exactly the same tonsil block.



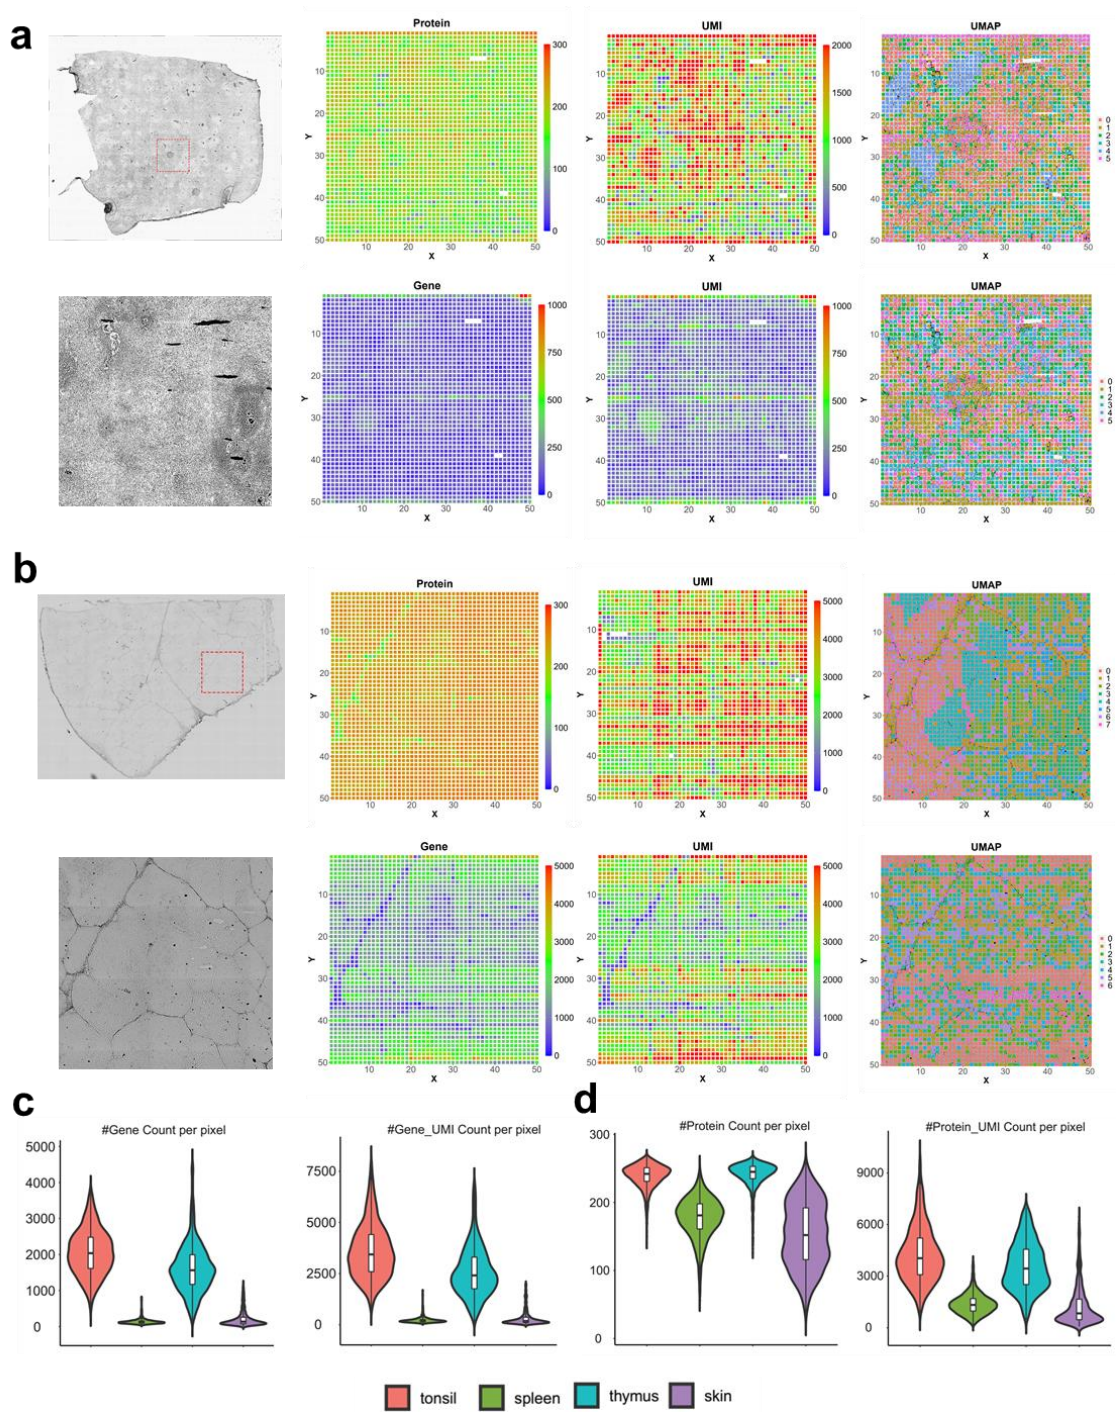

**Figure S4. Spatial mapping of human spleen and thymus with Spatial-CITE-seq.** A 273 antibodies cocktail was used for all four human samples. The bright field image, spatial gene heatmap, spatial gene UMI heatmap, spatial protein heatmap, spatial protein UMI heatmap, spatial clustering (based protein) and spatial clustering (based on RNA) of spleen (a) and thymus (b). (c) gene and gene UMI count per pixel of all four human samples. (d) Protein and protein UMI count per pixel of all four human samples.



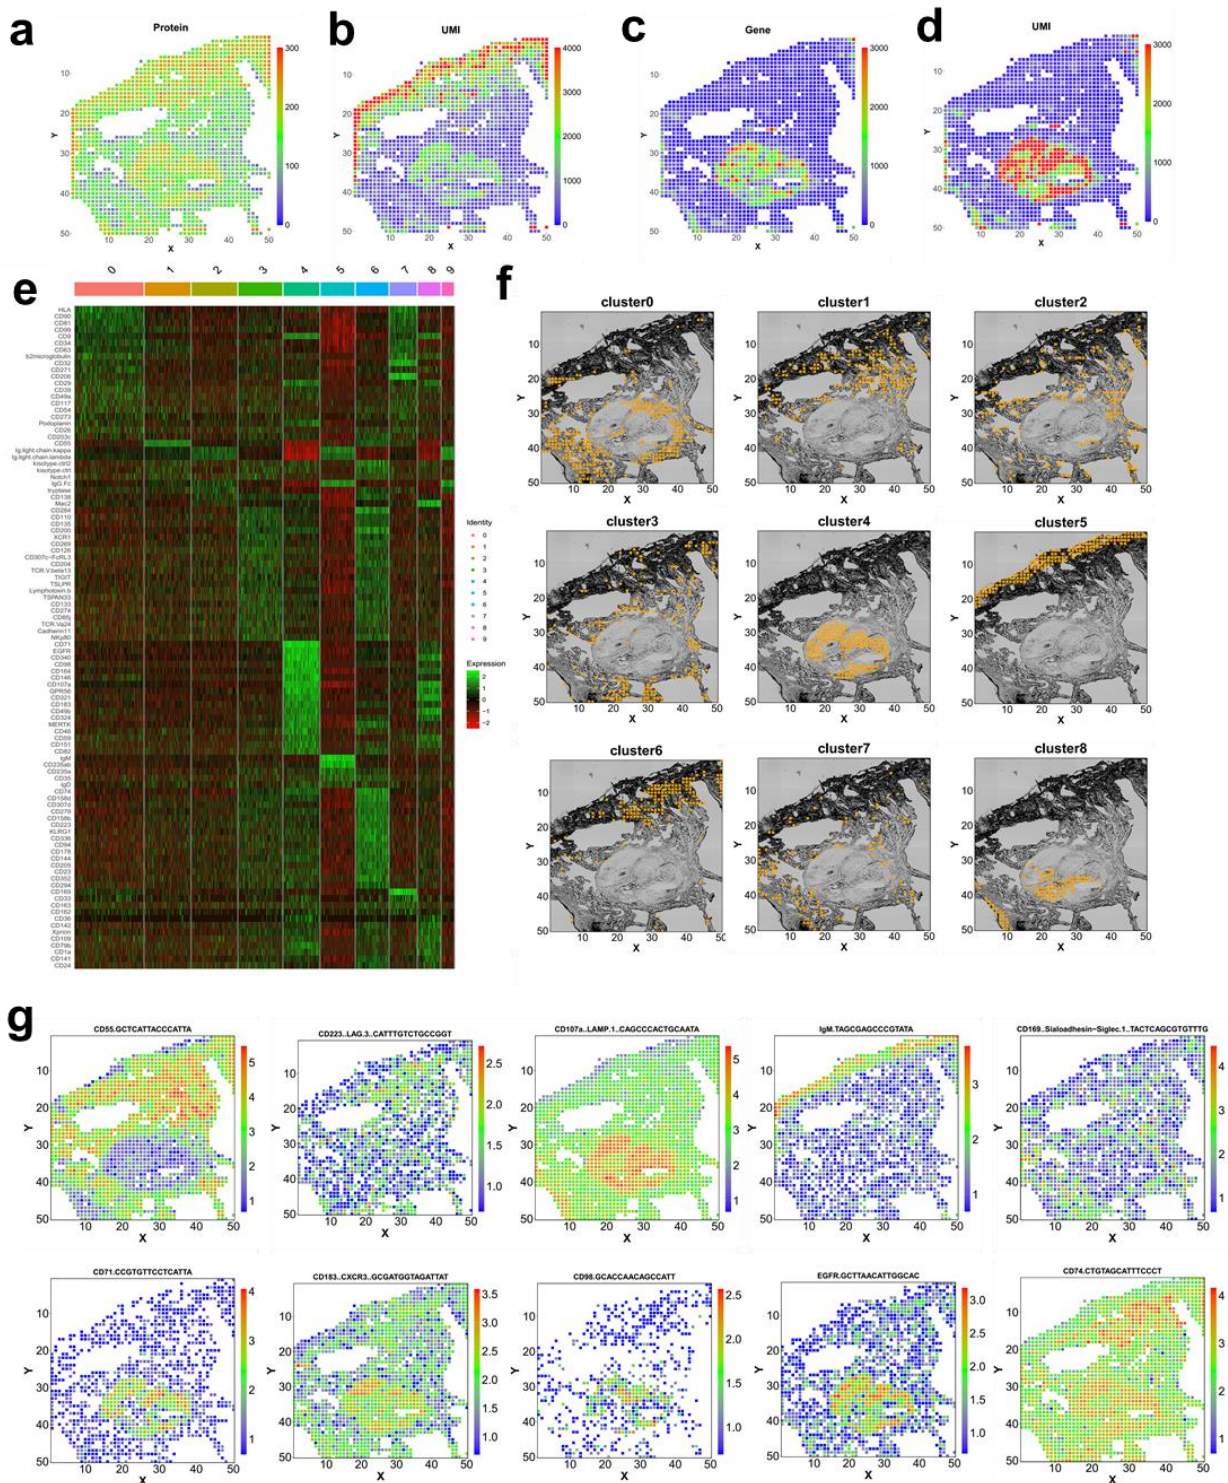

**Figure S5. Spatial profiling of human skin biopsy tissue collected from the COVID-19 mRNA vaccine injection site.** Spatial heatmap of gene (a), gene UMI (b), protein (c) and protein UMI (d). (e) Expression heatmap of the 10 clusters identified in skin biopsy sample. (f) the individual clusters plotted. (g) spatial distribution of some representative proteins.

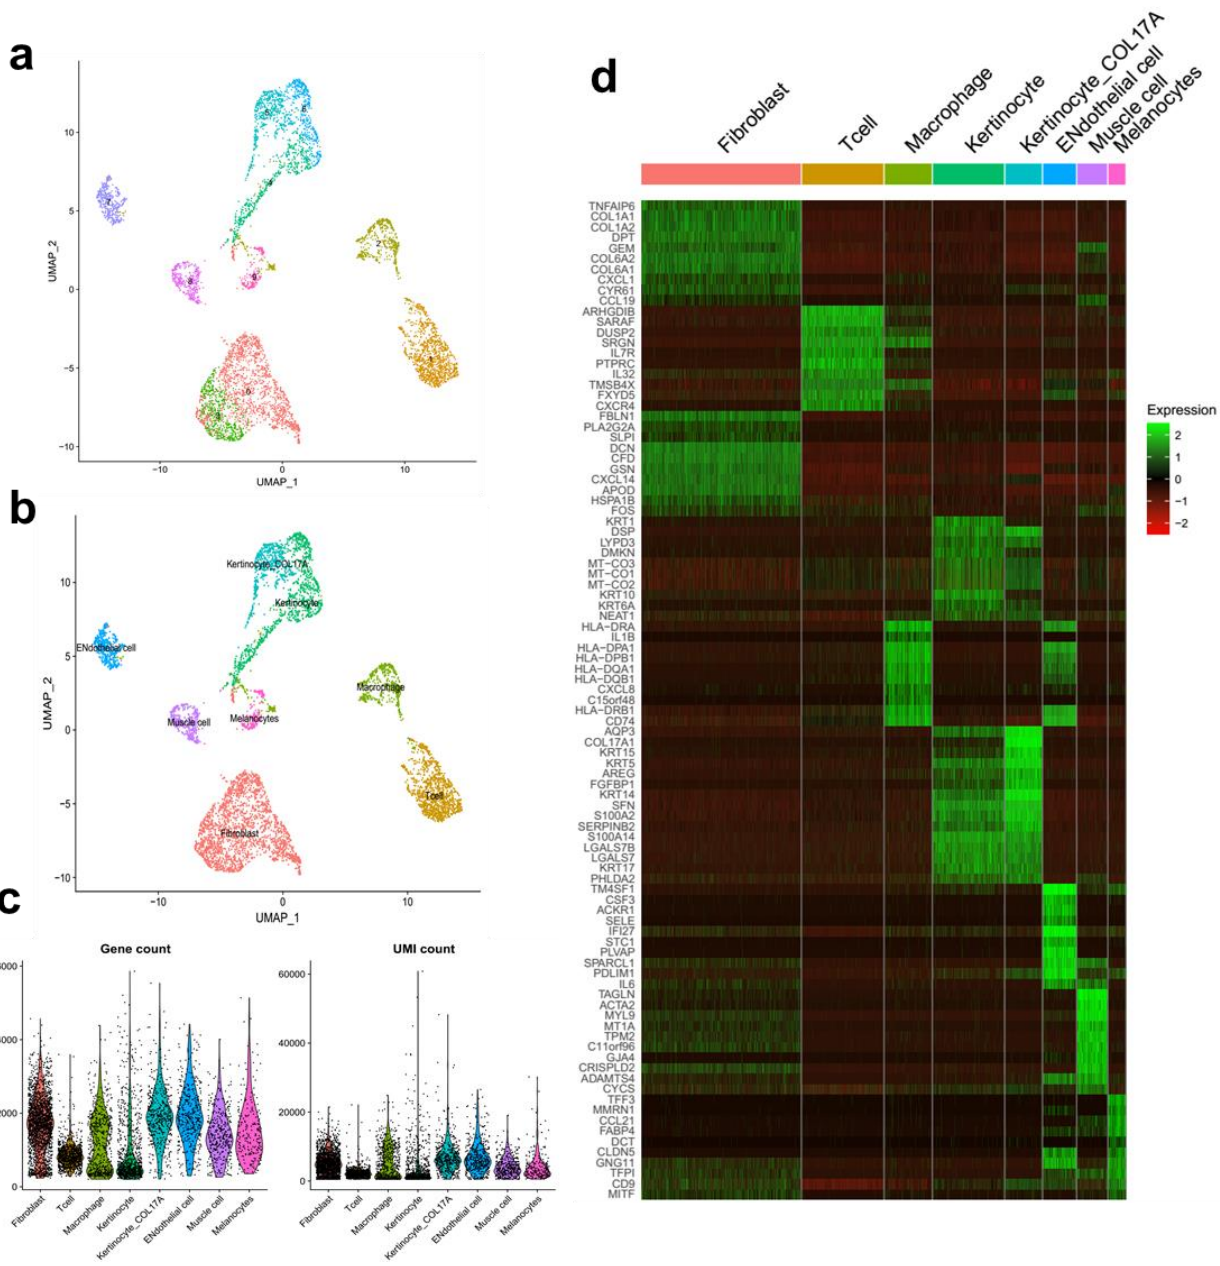

**Figure S6. scRNA-seq sequencing data of skin biopsy sample.** (a) spatial clusters of scRNA-seq data. (b) annotated cell types using canonical marker genes. (c) violin plot of genes and UMIs for each cell type. (d) Expression heatmap of different cell types.



**Table S1. Summary of gene and protein counts for all the samples sequenced.**

| Sample            | # Useful Pixels | # Unique genes present | # Unique proteins present | Average # genes per pixel | Average # gene UMIs per pixel | Average # proteins per pixel | Average # protein UMIs per pixel |
|-------------------|-----------------|------------------------|---------------------------|---------------------------|-------------------------------|------------------------------|----------------------------------|
| Spleen (Mouse)    | 1303            | 19923                  | 189                       | 1166                      | 1972                          | 118                          | 885                              |
| Colon (Mouse)     | 2037            | 19468                  | 189                       | 258                       | 462                           | 142                          | 1213                             |
| Intestine (Mouse) | 902             | 20444                  | 189                       | 172                       | 447                           | 129                          | 1796                             |
| Kidney (Mouse)    | 2419            | 23750                  | 189                       | 1367                      | 2675                          | 137                          | 1324                             |
| Tonsil (Human)    | 2492            | 28417                  | 273                       | 2079                      | 3639                          | 239                          | 4309                             |
| Spleen (Human)    | 2494            | 20236                  | 273                       | 132                       | 212                           | 177                          | 1403                             |
| Thymus (Human)    | 2500            | 28278                  | 273                       | 1647                      | 2633                          | 241                          | 3700                             |
| Skin (Human)      | 1691            | 15486                  | 273                       | 411                       | 815                           | 153                          | 1340                             |

**Table S2. DNA oligos for PCR, ligation and library preparation.** All Oligos were HPLC purified.

| Oligo Name            | Sequence                                                                                        |
|-----------------------|-------------------------------------------------------------------------------------------------|
| Primer 1              | CAAGCGTTGGCTTCTCGCATCT                                                                          |
| Primer 2              | AAGCAGTGGTATCAACGCAGAGT                                                                         |
| Primer 2-citeseq      | CCTTGGCACCCGAGAATT*C*C                                                                          |
| Ligation Linker       | CGAATGCTCTGGCCTCTCAAGCACGTGGAT                                                                  |
| Template Switch Oligo | AAGCAGTGGTATCAACGCAGAGTGAATrGrG+G                                                               |
| N501                  | AATGATACGGCGACCACCGAGATCTACACTAGATCGCTCGTCGGCAG<br>CGTCAGATGTGTATAAGAGACAG                      |
| N501-citeseq          | AATGATACGGCGACCACCGAGATCTACACTAGATCGCTCGTCGGCAG<br>CGTCAGATGTGTATAAGAGACAGCCTTGGCACCCGAGAATTCCA |
| N701                  | CAAGCAGAAGACGGCATAACGAGATTCGCCTTAGTCTCGTGGGCTCGG<br>AGATGTGTATAAGAGACAGCAAGCGTTGGCTTCTCGCATCT   |
| N702                  | CAAGCAGAAGACGGCATAACGAGATCTAGTACGGTCTCGTGGGCTCGG<br>AGATGTGTATAAGAGACAGCAAGCGTTGGCTTCTCGCATCT   |
| N703                  | CAAGCAGAAGACGGCATAACGAGATTTCTGCCTGTCTCGTGGGCTCGG<br>AGATGTGTATAAGAGACAGCAAGCGTTGGCTTCTCGCATCT   |
| N704                  | CAAGCAGAAGACGGCATAACGAGATGCTCAGGAGTCTCGTGGGCTCGG<br>AGATGTGTATAAGAGACAGCAAGCGTTGGCTTCTCGCATCT   |
| N705                  | CAAGCAGAAGACGGCATAACGAGATAGGAGTCCGTCTCGTGGGCTCGG<br>AGATGTGTATAAGAGACAGCAAGCGTTGGCTTCTCGCATCT   |

**Table S3. The list of 50 DNA Barcode As and 50 Barcode Bs.**

| <b>Barcode A (RT primer in 1<sup>st</sup> PDMS chip)</b> | <b>Sequence</b>                                     |
|----------------------------------------------------------|-----------------------------------------------------|
| Barcode A-1                                              | /5Phos/AGGCCAGAGCATT CGAACGTGATTTTTTTTTTTTTTTTTVN   |
| Barcode A-2                                              | /5Phos/AGGCCAGAGCATT CGAAACATCGTTTTTTTTTTTTTTTTVN   |
| Barcode A-3                                              | /5Phos/AGGCCAGAGCATT CGATGCCTAATTTTTTTTTTTTTTTTTVN  |
| Barcode A-4                                              | /5Phos/AGGCCAGAGCATT CGAGTGGTCATTTTTTTTTTTTTTTTTVN  |
| Barcode A-5                                              | /5Phos/AGGCCAGAGCATT CGACCACTGTTTTTTTTTTTTTTTTVN    |
| Barcode A-6                                              | /5Phos/AGGCCAGAGCATT CGACATTGGCTTTTTTTTTTTTTTTTTVN  |
| Barcode A-7                                              | /5Phos/AGGCCAGAGCATT CGCAGATCTGTTTTTTTTTTTTTTTTVN   |
| Barcode A-8                                              | /5Phos/AGGCCAGAGCATT CGCATCAAGTTTTTTTTTTTTTTTTVN    |
| Barcode A-9                                              | /5Phos/AGGCCAGAGCATT CGCGCTGATCTTTTTTTTTTTTTTTTTVN  |
| Barcode A-10                                             | /5Phos/AGGCCAGAGCATT CGACAAGCTATTTTTTTTTTTTTTTTTVN  |
| Barcode A-11                                             | /5Phos/AGGCCAGAGCATT CGCTGTAGCCTTTTTTTTTTTTTTTTTVN  |
| Barcode A-12                                             | /5Phos/AGGCCAGAGCATT CGAGTACAAGTTTTTTTTTTTTTTTTVN   |
| Barcode A-13                                             | /5Phos/AGGCCAGAGCATT CGAACCAACCATTTTTTTTTTTTTTTTTVN |
| Barcode A-14                                             | /5Phos/AGGCCAGAGCATT CGAACCGAGATTTTTTTTTTTTTTTTTVN  |
| Barcode A-15                                             | /5Phos/AGGCCAGAGCATT CGAACGCTTATTTTTTTTTTTTTTTTTVN  |
| Barcode A-16                                             | /5Phos/AGGCCAGAGCATT CGAAGACGGATTTTTTTTTTTTTTTTTVN  |
| Barcode A-17                                             | /5Phos/AGGCCAGAGCATT CGAAGGTACATTTTTTTTTTTTTTTTTVN  |
| Barcode A-18                                             | /5Phos/AGGCCAGAGCATT CGACACAGAATTTTTTTTTTTTTTTTTVN  |
| Barcode A-19                                             | /5Phos/AGGCCAGAGCATT CGACAGCAGATTTTTTTTTTTTTTTTTVN  |
| Barcode A-20                                             | /5Phos/AGGCCAGAGCATT CGACCTCCAATTTTTTTTTTTTTTTTTVN  |
| Barcode A-21                                             | /5Phos/AGGCCAGAGCATT CGACGCTCGATTTTTTTTTTTTTTTTTVN  |
| Barcode A-22                                             | /5Phos/AGGCCAGAGCATT CGACGTATCATTTTTTTTTTTTTTTTTVN  |
| Barcode A-23                                             | /5Phos/AGGCCAGAGCATT CGACTATGCATTTTTTTTTTTTTTTTTVN  |
| Barcode A-24                                             | /5Phos/AGGCCAGAGCATT CGAGAGTCAATTTTTTTTTTTTTTTTTVN  |
| Barcode A-25                                             | /5Phos/AGGCCAGAGCATT CGAGATCGCATTTTTTTTTTTTTTTTTVN  |
| Barcode A-26                                             | /5Phos/AGGCCAGAGCATT CGAGCAGGAATTTTTTTTTTTTTTTTTVN  |
| Barcode A-27                                             | /5Phos/AGGCCAGAGCATT CGAGTCACTATTTTTTTTTTTTTTTTTVN  |
| Barcode A-28                                             | /5Phos/AGGCCAGAGCATT CGATCCTGTATTTTTTTTTTTTTTTTTVN  |
| Barcode A-29                                             | /5Phos/AGGCCAGAGCATT CGATTGAGGATTTTTTTTTTTTTTTTTVN  |
| Barcode A-30                                             | /5Phos/AGGCCAGAGCATT CGCAACCACATTTTTTTTTTTTTTTTTVN  |
| Barcode A-31                                             | /5Phos/AGGCCAGAGCATT CGGACTAGTATTTTTTTTTTTTTTTTTVN  |
| Barcode A-32                                             | /5Phos/AGGCCAGAGCATT CGCAATGGAATTTTTTTTTTTTTTTTTVN  |
| Barcode A-33                                             | /5Phos/AGGCCAGAGCATT CGCACTTCGATTTTTTTTTTTTTTTTTVN  |
| Barcode A-34                                             | /5Phos/AGGCCAGAGCATT CGCAGCGTTATTTTTTTTTTTTTTTTTVN  |
| Barcode A-35                                             | /5Phos/AGGCCAGAGCATT CGCATACCAATTTTTTTTTTTTTTTTTVN  |
| Barcode A-36                                             | /5Phos/AGGCCAGAGCATT CGCCAGTTCATTTTTTTTTTTTTTTTTVN  |
| Barcode A-37                                             | /5Phos/AGGCCAGAGCATT CGCCGAAGTATTTTTTTTTTTTTTTTTVN  |
| Barcode A-38                                             | /5Phos/AGGCCAGAGCATT CGCCGTGAGATTTTTTTTTTTTTTTTTVN  |



|                                                                      |                                                                      |
|----------------------------------------------------------------------|----------------------------------------------------------------------|
| Barcode A-39                                                         | /5Phos/AGGCCAGAGCATTGCGCTCCTGATTTTTTTTTTTTTTTTTVN                    |
| Barcode A-40                                                         | /5Phos/AGGCCAGAGCATTGCGGAACTTATTTTTTTTTTTTTTTTTVN                    |
| Barcode A-41                                                         | /5Phos/AGGCCAGAGCATTGCGGACTGGATTTTTTTTTTTTTTTTTVN                    |
| Barcode A-42                                                         | /5Phos/AGGCCAGAGCATTGCGGCATACATTTTTTTTTTTTTTTTTVN                    |
| Barcode A-43                                                         | /5Phos/AGGCCAGAGCATTGCGCTCAATGATTTTTTTTTTTTTTTTTVN                   |
| Barcode A-44                                                         | /5Phos/AGGCCAGAGCATTGCGTGAGCCATTTTTTTTTTTTTTTTTVN                    |
| Barcode A-45                                                         | /5Phos/AGGCCAGAGCATTGCGTGGCATATTTTTTTTTTTTTTTTTVN                    |
| Barcode A-46                                                         | /5Phos/AGGCCAGAGCATTGCGAATCTGATTTTTTTTTTTTTTTTTVN                    |
| Barcode A-47                                                         | /5Phos/AGGCCAGAGCATTGCGAAGACTATTTTTTTTTTTTTTTTTVN                    |
| Barcode A-48                                                         | /5Phos/AGGCCAGAGCATTGCGGAGCTGAATTTTTTTTTTTTTTTTTVN                   |
| Barcode A-49                                                         | /5Phos/AGGCCAGAGCATTGCGATAGACATTTTTTTTTTTTTTTTTVN                    |
| Barcode A-50                                                         | /5Phos/AGGCCAGAGCATTGCGCCACATATTTTTTTTTTTTTTTTTVN                    |
| <b>Barcode B (Ligation to Barcode A in 2<sup>nd</sup> PDMS chip)</b> | <b>Sequence</b>                                                      |
| Barcode B-1                                                          | /5Biosg/CAAGCGTTGGCTTCTCGCATCTNNNNNNNNNNAACGTGATATC<br>CACGTGCTTGAG  |
| Barcode B-2                                                          | /5Biosg/CAAGCGTTGGCTTCTCGCATCTNNNNNNNNNNAACATCGATC<br>CACGTGCTTGAG   |
| Barcode B-3                                                          | /5Biosg/CAAGCGTTGGCTTCTCGCATCTNNNNNNNNNNATGCCTAAATC<br>CACGTGCTTGAG  |
| Barcode B-4                                                          | /5Biosg/CAAGCGTTGGCTTCTCGCATCTNNNNNNNNNNAGTGGTCAATC<br>CACGTGCTTGAG  |
| Barcode B-5                                                          | /5Biosg/CAAGCGTTGGCTTCTCGCATCTNNNNNNNNNNACCACTGTATC<br>CACGTGCTTGAG  |
| Barcode B-6                                                          | /5Biosg/CAAGCGTTGGCTTCTCGCATCTNNNNNNNNNNACATTGGCATC<br>CACGTGCTTGAG  |
| Barcode B-7                                                          | /5Biosg/CAAGCGTTGGCTTCTCGCATCTNNNNNNNNNNCAGATCTGATC<br>CACGTGCTTGAG  |
| Barcode B-8                                                          | /5Biosg/CAAGCGTTGGCTTCTCGCATCTNNNNNNNNNNCATCAAGTATC<br>CACGTGCTTGAG  |
| Barcode B-9                                                          | /5Biosg/CAAGCGTTGGCTTCTCGCATCTNNNNNNNNNNCGCTGATCATC<br>CACGTGCTTGAG  |
| Barcode B-10                                                         | /5Biosg/CAAGCGTTGGCTTCTCGCATCTNNNNNNNNNNACAAGCTAATC<br>CACGTGCTTGAG  |
| Barcode B-11                                                         | /5Biosg/CAAGCGTTGGCTTCTCGCATCTNNNNNNNNNNCTGTAGCCATC<br>CACGTGCTTGAG  |
| Barcode B-12                                                         | /5Biosg/CAAGCGTTGGCTTCTCGCATCTNNNNNNNNNNAGTACAAGATC<br>CACGTGCTTGAG  |
| Barcode B-13                                                         | /5Biosg/CAAGCGTTGGCTTCTCGCATCTNNNNNNNNNNNAACAACCAATC<br>CACGTGCTTGAG |
| Barcode B-14                                                         | /5Biosg/CAAGCGTTGGCTTCTCGCATCTNNNNNNNNNNNAACCGAGAATC<br>CACGTGCTTGAG |
| Barcode B-15                                                         | /5Biosg/CAAGCGTTGGCTTCTCGCATCTNNNNNNNNNNNAACGCTTAATC<br>CACGTGCTTGAG |
| Barcode B-16                                                         | /5Biosg/CAAGCGTTGGCTTCTCGCATCTNNNNNNNNNNNAAGACGGAATC<br>CACGTGCTTGAG |
| Barcode B-17                                                         | /5Biosg/CAAGCGTTGGCTTCTCGCATCTNNNNNNNNNNNAAGGTACAATC<br>CACGTGCTTGAG |
| Barcode B-18                                                         | /5Biosg/CAAGCGTTGGCTTCTCGCATCTNNNNNNNNNNNACACAGAAATC<br>CACGTGCTTGAG |

|              |                                                                      |
|--------------|----------------------------------------------------------------------|
| Barcode B-19 | /5Biosg/CAAGCGTTGGCTTCTCGCATCTNNNNNNNNNNACAGCAGAATC<br>CACGTGCTTGAG  |
| Barcode B-20 | /5Biosg/CAAGCGTTGGCTTCTCGCATCTNNNNNNNNNNACCTCAAATC<br>CACGTGCTTGAG   |
| Barcode B-21 | /5Biosg/CAAGCGTTGGCTTCTCGCATCTNNNNNNNNNNACGCTCGAATC<br>CACGTGCTTGAG  |
| Barcode B-22 | /5Biosg/CAAGCGTTGGCTTCTCGCATCTNNNNNNNNNNACGTATCAATC<br>CACGTGCTTGAG  |
| Barcode B-23 | /5Biosg/CAAGCGTTGGCTTCTCGCATCTNNNNNNNNNNACTATGCAATC<br>CACGTGCTTGAG  |
| Barcode B-24 | /5Biosg/CAAGCGTTGGCTTCTCGCATCTNNNNNNNNNNAGAGTCAAATC<br>CACGTGCTTGAG  |
| Barcode B-25 | /5Biosg/CAAGCGTTGGCTTCTCGCATCTNNNNNNNNNNAGATCGCAATC<br>CACGTGCTTGAG  |
| Barcode B-26 | /5Biosg/CAAGCGTTGGCTTCTCGCATCTNNNNNNNNNNAGCAGGAAATC<br>CACGTGCTTGAG  |
| Barcode B-27 | /5Biosg/CAAGCGTTGGCTTCTCGCATCTNNNNNNNNNNAGTCACTAATC<br>CACGTGCTTGAG  |
| Barcode B-28 | /5Biosg/CAAGCGTTGGCTTCTCGCATCTNNNNNNNNNNATCCTGTAATCC<br>ACGTGCTTGAG  |
| Barcode B-29 | /5Biosg/CAAGCGTTGGCTTCTCGCATCTNNNNNNNNNNATTGAGGAATC<br>CACGTGCTTGAG  |
| Barcode B-30 | /5Biosg/CAAGCGTTGGCTTCTCGCATCTNNNNNNNNNNCAACCACAATC<br>CACGTGCTTGAG  |
| Barcode B-31 | /5Biosg/CAAGCGTTGGCTTCTCGCATCTNNNNNNNNNNGACTAGTAATC<br>CACGTGCTTGAG  |
| Barcode B-32 | /5Biosg/CAAGCGTTGGCTTCTCGCATCTNNNNNNNNNNCAATGGAAATC<br>CACGTGCTTGAG  |
| Barcode B-33 | /5Biosg/CAAGCGTTGGCTTCTCGCATCTNNNNNNNNNNCACTTCGAATC<br>CACGTGCTTGAG  |
| Barcode B-34 | /5Biosg/CAAGCGTTGGCTTCTCGCATCTNNNNNNNNNNCAGCGTTAATC<br>CACGTGCTTGAG  |
| Barcode B-35 | /5Biosg/CAAGCGTTGGCTTCTCGCATCTNNNNNNNNNNCATAACCAAATC<br>CACGTGCTTGAG |
| Barcode B-36 | /5Biosg/CAAGCGTTGGCTTCTCGCATCTNNNNNNNNNNCCAGTTCAATC<br>CACGTGCTTGAG  |
| Barcode B-37 | /5Biosg/CAAGCGTTGGCTTCTCGCATCTNNNNNNNNNNCCGAAGTAATC<br>CACGTGCTTGAG  |
| Barcode B-38 | /5Biosg/CAAGCGTTGGCTTCTCGCATCTNNNNNNNNNNCCGTGAGAATC<br>CACGTGCTTGAG  |
| Barcode B-39 | /5Biosg/CAAGCGTTGGCTTCTCGCATCTNNNNNNNNNNCCTCCTGAATC<br>CACGTGCTTGAG  |
| Barcode B-40 | /5Biosg/CAAGCGTTGGCTTCTCGCATCTNNNNNNNNNNCGAACTTAATC<br>CACGTGCTTGAG  |
| Barcode B-41 | /5Biosg/CAAGCGTTGGCTTCTCGCATCTNNNNNNNNNNCGACTGGAATC<br>CACGTGCTTGAG  |
| Barcode B-42 | /5Biosg/CAAGCGTTGGCTTCTCGCATCTNNNNNNNNNNCGCATAACAATC<br>CACGTGCTTGAG |
| Barcode B-43 | /5Biosg/CAAGCGTTGGCTTCTCGCATCTNNNNNNNNNNCTCAATGAATC<br>CACGTGCTTGAG  |
| Barcode B-44 | /5Biosg/CAAGCGTTGGCTTCTCGCATCTNNNNNNNNNNCTGAGCCAATC<br>CACGTGCTTGAG  |
| Barcode B-45 | /5Biosg/CAAGCGTTGGCTTCTCGCATCTNNNNNNNNNNCTGGCATAATC<br>CACGTGCTTGAG  |

|              |                                                                     |
|--------------|---------------------------------------------------------------------|
| Barcode B-46 | /5Biosg/CAAGCGTTGGCTTCTCGCATCTNNNNNNNNNNGAATCTGAATC<br>CACGTGCTTGAG |
| Barcode B-47 | /5Biosg/CAAGCGTTGGCTTCTCGCATCTNNNNNNNNNNCAAGACTAATC<br>CACGTGCTTGAG |
| Barcode B-48 | /5Biosg/CAAGCGTTGGCTTCTCGCATCTNNNNNNNNNNGAGCTGAAATC<br>CACGTGCTTGAG |
| Barcode B-49 | /5Biosg/CAAGCGTTGGCTTCTCGCATCTNNNNNNNNNNGATAGACAATC<br>CACGTGCTTGAG |
| Barcode B-50 | /5Biosg/CAAGCGTTGGCTTCTCGCATCTNNNNNNNNNNGCCACATAATC<br>CACGTGCTTGAG |



**Table S4. Chemicals and reagents used.**

| <b>Name</b>                           | <b>Catlog Number</b> | <b>Vender</b>       |
|---------------------------------------|----------------------|---------------------|
| Maxima H Minus                        | EP7051               | Thermo Fisher       |
| dNTP mix                              | R0192                | Thermo Fisher       |
| RNase Inhibitor                       | Y9240L               | Enzymatics          |
| SUPERase• In™ RNase Inhibitor         | AM2694               | Thermo Fisher       |
| T4 DNA Ligase                         | M0202L               | New England Biolabs |
| Ampure XP beads                       | A63880               | Beckman Coulter     |
| Dynabeads MyOne C1                    | 65001                | Thermo Fisher       |
|                                       | 65002                |                     |
| Nextera XT DNA Preparation Kit        | FC-131-1024          | Illumina            |
| Kapa Hotstart HiFi ReadyMix           | KK2601               | Kapa Biosystems     |
| Proteinase K, recombinant, PCR grade  | EO0491               | Thermo Fisher       |
| RNase free water                      | 10977015             | Invitrogen          |
| Ethanol                               | 187380-4L            | Sigma               |
| Formaldehyde solution                 | F8775-25ML           | Sigma               |
| Triton X-100                          | T8787-100ML          | Sigma               |
| NEBuffer 3.1                          | B7203S               | New England Biolabs |
| T4 DNA Ligase Reaction Buffer         | B0202S               | New England Biolabs |
| Binding and washing (B&W) Buffer (2x) | 15568025             | Thermo Fisher       |
|                                       | AM9261               | Thermo Fisher       |
|                                       | AM9760G              | Thermo Fisher       |
| Tween 20                              | 3005                 | Thermo Fisher       |

**Table S5. ADT lists for human and mouse. See attached Excel Spreadsheet - Table S5.**
